# Supplementary material for: Directed evolution of bacteriophages: thwarted by prolific prophage
Source: PubMed Central journal article supplement (PMC11577772; doi:10.1128/aem.00884-24), 2024-10-30
Supplement: aem.00884-24-s0001.pdf [file aem.00884-24-s0001.pdf]

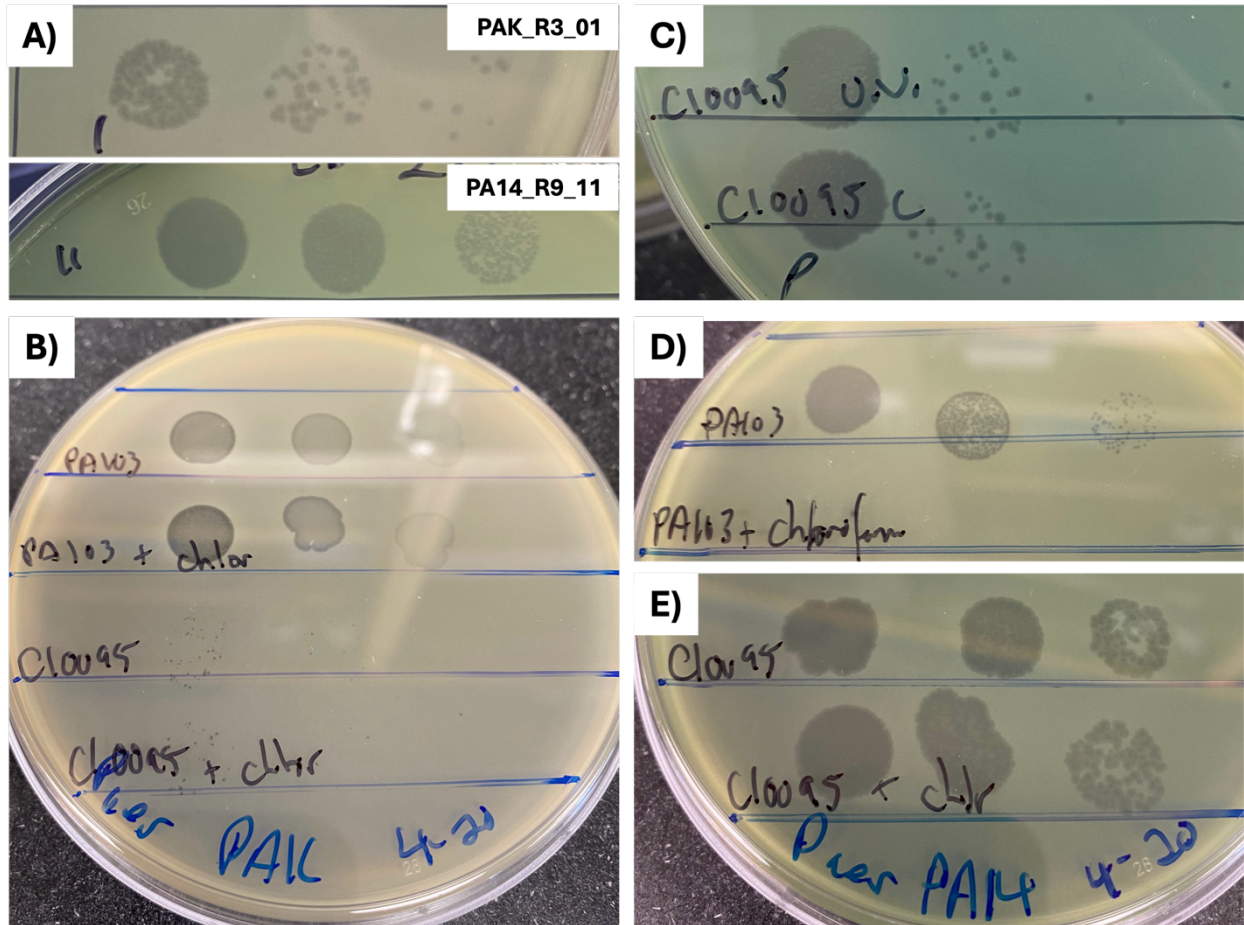

**Supplemental Figure 1.** Examples of plaque formation and inhibitory activity from lysate that has been ten-fold serially diluted and spotted in 10ul volumes onto lawns of *P. aeruginosa*. **A)** Examples of plaque formation on non-permissive host PA14 from two output phages PAK\_R3\_01 and PA14\_R9\_11. **B)** Examples of inhibitory activity (from PA103 supernatant) and plaque formation (from CI00795 supernatant) on strain PAK; **note** how PA103 supernatant does not resolve into individual plaques at higher dilutions, which is characteristic of tailocin (aka pyocin) activity. **C)** Exposure of cultures to ultraviolet light (CI00795 u.v.) did not increase level of plaque formation compared to control (CI00795 c). **D)** Example of plaque formation from PA103 supernatant on strain PAO1; exposure to chloroform eradicated plaque formation. **E)** Example of plaque formation from CI00795 supernatant on host strain PA14; exposure to chloroform had no effect.

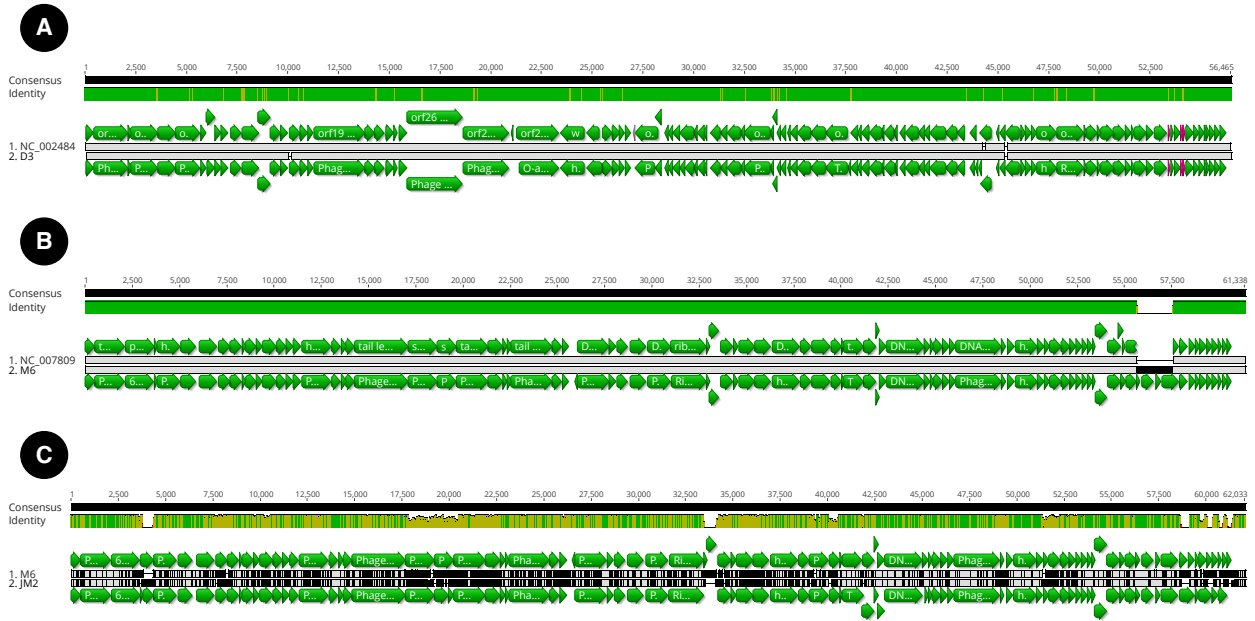

**Supplemental Figure 2.** Genome maps and pairwise alignments of input parental phages **A)** D3 with D3 reference genome NC\_002484, **B)** M6 with M6 reference genome NC\_007809, and **C)** JM2 aligned with M6.

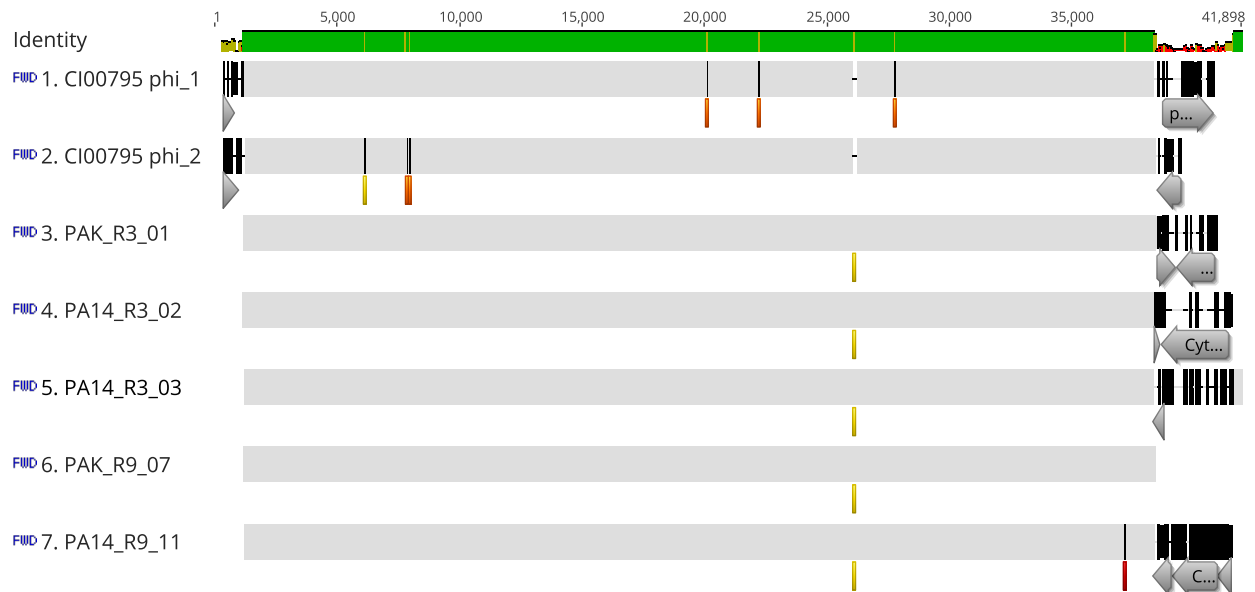

**Supplemental Figure 3.** Multiple sequence alignment of two integrated *Casadabanvirus* prophages (phi\_1 and phi\_2) from CI00795 and five prophage-derived output phages isolated from the Appelmans experiment. Gray arrows indicate heterogenous bacterial host DNA, yellow tick marks indicate synonymous and intergenic mutations, orange tick marks indicate nonsynonymous mutations between the two integrated prophages (phi\_1 and phi\_2), red tick mark indicates unique nonsynonymous mutation (PA14\_R9\_11).

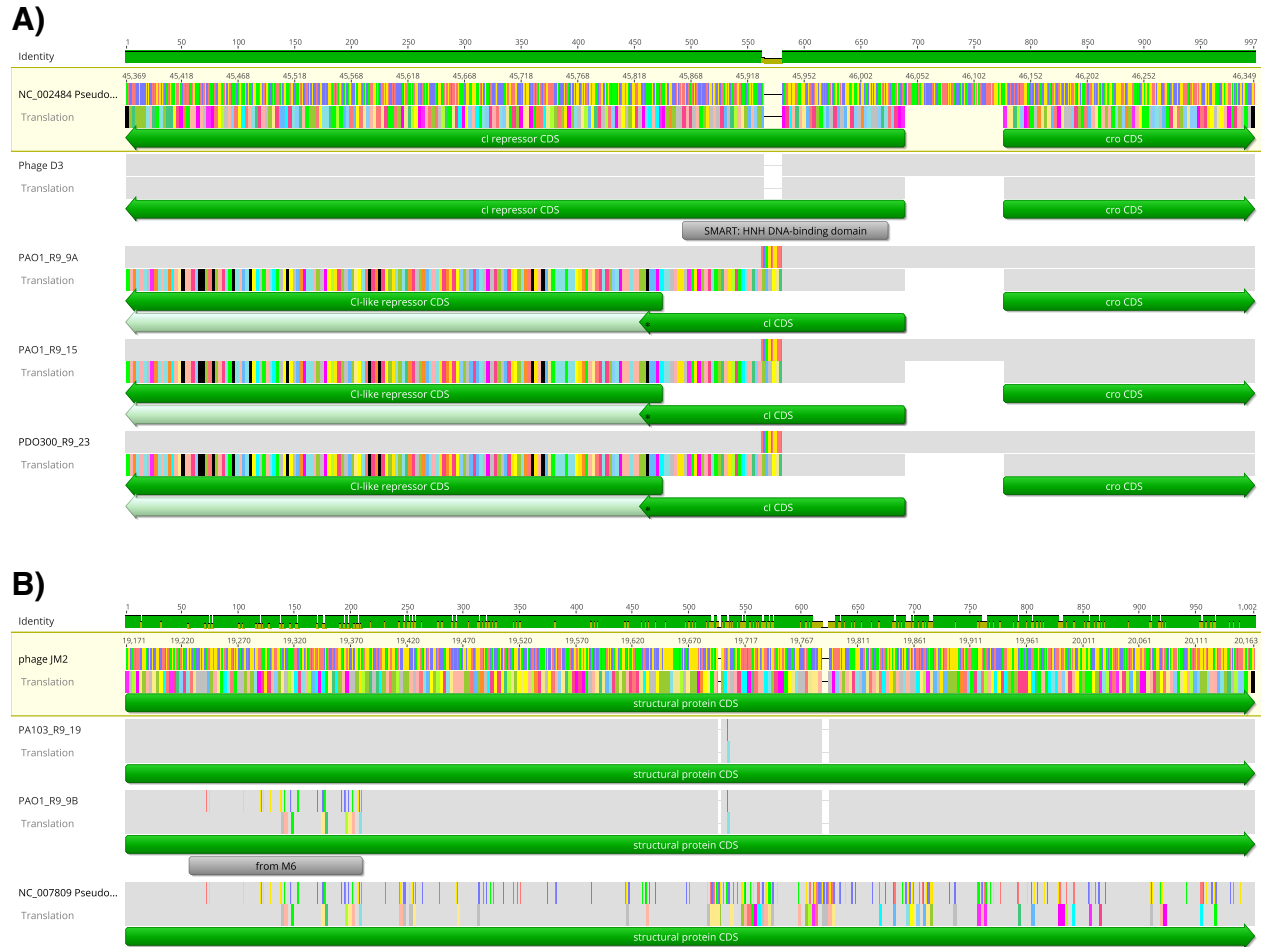

**Supplemental Figure 4.** Multiple sequence alignments of Appelmans output phages derived from input phages. **A)** D3 derived output phages aligned with input phage D3 and the D3 RefSeq genome NC\_002484, showing the *cl/cro* repressor genes (D3p074). Output phages PAO1\_R9\_9A, PAO1\_R9\_15, and PDO300\_R9\_23 all shared a 19bp insertion in the N-terminal of the *cl* repressor gene, altering the open reading frame. SMART predicted DNA-binding functional domain is annotated (residues 6-60). **B)** JM2 derived output phages aligned with input phage JM2 and M6 RefSeq genome NC\_007809, showing the 154 bp region of recombination in the N-terminal of the structural virion protein (locus tag: PPM6\_gp033) between JM2 and M6 in output phage PAO1\_R9\_9B, resulting in nine amino acid changes in that region. One amino acid substitution is also depicted for both PAO1\_R9\_9B and PA103\_R9\_19 at residue 178/331 (Ser->Arg).

**Supplemental Table 1.** Variant analysis of the *Casadabanvirus* prophages integrated at two loci in the genome of bacterial host *P. aeruginosa* strain CI00795 (referred to as phi\_1 and phi\_2) and output prophage derived samples isolated from the Appelmans experiment.

| <b>Nucleotide position*</b>                                                                                                 | <b>gene</b>                                         | <b>nucleotide</b> |                           | <b>residue</b> | <b>amino acid</b> |       |
|-----------------------------------------------------------------------------------------------------------------------------|-----------------------------------------------------|-------------------|---------------------------|----------------|-------------------|-------|
| <b>Prophages integrated into CI00795 genome</b>                                                                             |                                                     |                   |                           |                |                   |       |
|                                                                                                                             |                                                     | phi_1             | phi_2                     |                | phi_1             | phi_2 |
| 5,002                                                                                                                       | DNA transposition protein                           | G                 | A                         | 110            | synonymous        |       |
| 6,681                                                                                                                       | DNA binding protein                                 | A                 | G                         | 175            | Ile               | Val   |
| 6,822                                                                                                                       | transmembrane/signal peptide domain contain protein | A                 | G                         | 15             | Asp               | Gly   |
| 18,945                                                                                                                      | type I-E anti-CRISPR protein                        | A                 | G                         | 44             | Ser               | Gly   |
| 21,057                                                                                                                      | Mu-like-gpT major capsid protein                    | A                 | G                         | 72             | Ser               | Gly   |
| 26,638                                                                                                                      | Tape measure protein                                | A                 | G                         | 556            | Thr               | Ala   |
| <b>Unique mutations in output phages derived from prophages</b>                                                             |                                                     |                   |                           |                |                   |       |
|                                                                                                                             |                                                     | <b>Ref</b>        | <b>Five output phages</b> |                |                   |       |
| 24,939                                                                                                                      | Intergenic <- tape measure protein                  | GGGGG             | G+GGGGG                   | N/A            | N/A               | N/A   |
|                                                                                                                             |                                                     | <b>Ref</b>        | <b>PA14_R9_11</b>         |                |                   |       |
| 35,980                                                                                                                      | Putative tail fiber protein                         | G                 | A                         | 203            | Asp               | Asn   |
| *in reference to genome of CI00795 phi_1 (integrated at nucleotide position 771,168 -> 808,37 of Genbank Accesion CP158022) |                                                     |                   |                           |                |                   |       |

**Supplemental Table 2.** Results from PCR verification of the CI00795 prophages host range based individual testing of plaques with both primer sets, with no evidence or double positives.

| Prophage Target*      | <i>Pseudomonas aeruginosa</i> host strains |     |       |      |        |
|-----------------------|--------------------------------------------|-----|-------|------|--------|
|                       | PAO1                                       | PAK | PA103 | PA14 | PDO300 |
| <i>Casadabanvirus</i> | +                                          | +   | +     | +    | +      |
| <i>Hollowayvirus</i>  | --                                         | +   | --    | --   | +      |

\*Primers were unique to the large terminase subunit of either prophage.

**Supplemental Table 3.** Bacterial and bacteriophage strains used in this study.

| Bacterial Strain                                                                              | Source                                                                                                            |
|-----------------------------------------------------------------------------------------------|-------------------------------------------------------------------------------------------------------------------|
| PAO1 Seattle*                                                                                 | Pradeep Singh, University of Iowa Eckstein Medical Research Building                                              |
| PAO1 Fralick                                                                                  | Joe A. Fralick, Department of Immunology and Molecular Microbiology, Texas Tech University Health Sciences Center |
| PA103                                                                                         | Pradeep Singh, University of Iowa Eckstein Medical Research Building                                              |
| PA14                                                                                          | Joe A. Fralick, Department of Immunology and Molecular Microbiology, Texas Tech University Health Sciences Center |
| PAK                                                                                           | Pradeep Singh, University of Iowa Eckstein Medical Research Building                                              |
| PDO300                                                                                        | Pradeep Singh, University of Iowa Eckstein Medical Research Building                                              |
| CI00780                                                                                       | Texas Department of Health, Jim Bull                                                                              |
| CI00795                                                                                       | Texas Department of Health, Jim Bull                                                                              |
| CI01788                                                                                       | Texas Department of Health, Jim Bull,                                                                             |
| Phage Strain                                                                                  |                                                                                                                   |
| D3**                                                                                          | ATCC BAA-47-B1                                                                                                    |
| M6                                                                                            | Received from Denise Tremblay at the University of Laval Oral Ecology Research Group                              |
| JM2                                                                                           | Isolated from Moscow, ID sewer sample May 2005                                                                    |
| *Used as phage propagation host strain for all input phage, not used in Appelmans             |                                                                                                                   |
| **This strain was listed as F116 when ordered from ATCC; sequencing confirmed it as phage D3. |                                                                                                                   |
